# Supplementary material
Source: MDPI journal article supplement (https://www.mdpi.com/1999-4907/13/3/369)
Supplement: s1 [file s1]

Supplementary Information for “Assessment of NO<sub>2</sub> purification by urban forests based on the i-Tree Eco model: Case study in Beijing, China”

Figure:

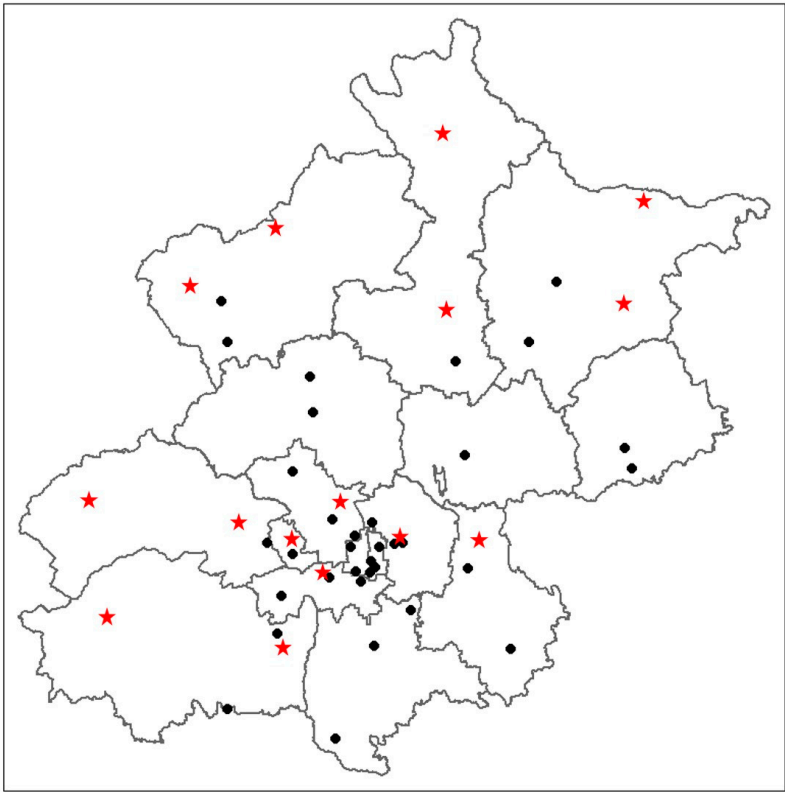

Figure S1. Air pollutants monitor stations and meteorological stations in 16 districts of Beijing.  
(Dot: location of air pollutants monitor station, Star: location of meteorological station.)

Table:

Table S1 Previous studies on the effects of urban forests on air quality.

| Study area     | Method | Air pollutants                                                         | Study period | Sources               |
|----------------|--------|------------------------------------------------------------------------|--------------|-----------------------|
| Beijing, China | UFORE  | NO <sub>2</sub> /O <sub>3</sub> /<br>SO <sub>2</sub> /PM <sub>10</sub> | 1 year       | Yang et al.<br>(2005) |

|                      |            |                                                                          |        |                                 |
|----------------------|------------|--------------------------------------------------------------------------|--------|---------------------------------|
| United States        | UFORE      | NO <sub>2</sub> /O <sub>3</sub> /SO <sub>2</sub><br>/CO/PM <sub>10</sub> | 1 year | Nowak et al.<br>(2006)          |
| Santiago,<br>Chile   | i-Tree Eco | NO <sub>2</sub> /O <sub>3</sub> /SO <sub>2</sub><br>/CO/PM <sub>10</sub> | 2 year | Escobedo and<br>Nowak (2009)    |
| Baltimore, MD,<br>US | i-Tree Eco | NO <sub>2</sub>                                                          | 1 year | Cabaraban et al.<br>(2013)      |
| United States        | i-Tree Eco | NO <sub>2</sub> /O <sub>3</sub> /SO <sub>2</sub> /PM <sub>2.5</sub>      | 1 year | Hirabayashi and<br>Nowak (2016) |
| Shenzhen,<br>China   | i-Tree Eco | PM <sub>2.5</sub>                                                        | 1 year | Wu et al. (2019)                |
| Tabriz,<br>Iran      | i-Tree Eco | NO <sub>2</sub> /O <sub>3</sub> /SO <sub>2</sub><br>/CO/PM <sub>10</sub> | 1 year | Parsa et al.<br>(2019)          |

Table S2. The area of 16 districts in Beijing

| District name   | Urban/Suburban | Area (km <sup>2</sup> ) <sup>1</sup> |
|-----------------|----------------|--------------------------------------|
| DongCheng (DC)  | Urban          | 41.84                                |
| Xicheng (XC)    | Urban          | 50.70                                |
| Chaoyang (CY)   | Urban          | 470.80                               |
| Haidian (HD)    | Urban          | 430.77                               |
| Fengtai (FT)    | Urban          | 306.00                               |
| Shijingshan(SJ) | Urban          | 85.74                                |
| Shunyi(SY)      | Suburban       | 1021.00                              |
| Tongzhou(TZ)    | Suburban       | 1193.95                              |
| Daxing (DX)     | Suburban       | 1036.33                              |
| Fangshan (FS)   | Suburban       | 2019.00                              |
| Mentougou (MT)  | Suburban       | 1447.85                              |
| Changping(CP)   | Suburban       | 1343.50                              |
| Pinggu(PG)      | Suburban       | 948.24                               |
| Miyun(MY)       | Suburban       | 2229.45                              |
| Huairou(HR)     | Suburban       | 2122.80                              |
| Yanqing(YQ)     | Suburban       | 1994.88                              |

<sup>1</sup> The area data were acquired from Beijing Municipal Bureau Statistics (Beijing Municipal Bureau Statistics, 2020).

Table S3: NO<sub>2</sub> deposition velocity for three forest types (m/s)

| Type of vegetation | Mean   | S.D.   | Max    | Min    |
|--------------------|--------|--------|--------|--------|
| Evergreen forest   | 0.0016 | 0.0011 | 0.0029 | 0.0002 |
| deciduous forest   | 0.0023 | 0.0016 | 0.004  | 0.0002 |
| Mix forest         | 0.0016 | 0.0013 | 0.0034 | 0.0002 |

Table S4: Model selection using a backward procedure based on AICc , VIF, and adjusted r square of the best set of explanatory factors explaining the variation of NO<sub>2</sub> removal capacity.

| Models              |                    | Model 1<br>(green-<br>only) | Model 2<br>(envir) | Model 3<br>(eco) | Model 4<br>(energy) | Model 5<br>(full) | Model 6<br>(final) |
|---------------------|--------------------|-----------------------------|--------------------|------------------|---------------------|-------------------|--------------------|
| Model<br>parameters | Max VIF            | 1.89                        | 13.40              | 21.97            | 57.91               | 106.24            | 4.81               |
|                     | Adj.r <sup>2</sup> | 0.59                        | 0.63               | 0.71             | 0.78                | 0.81              | 0.77               |
|                     | AICc               | 192.07                      | 188.09             | 171.03           | 151.71              | 137.89            | 146.06             |
|                     | ΔAICc              | 54.18                       | 50.20              | 33.14            | 13.82               | 0.00              | 8.17               |
| Environment         | Green              | Green                       |                    |                  |                     |                   |                    |
|                     | NO <sub>2</sub>    |                             |                    |                  |                     |                   |                    |
|                     | PM                 |                             |                    |                  |                     |                   |                    |
|                     | PM <sub>2.5</sub>  |                             |                    |                  |                     |                   |                    |
|                     | SO <sub>2</sub>    |                             |                    |                  |                     |                   |                    |
| Economic            | Exp-Envir          | Economic                    |                    |                  |                     |                   |                    |
|                     | PCDI               |                             |                    |                  |                     |                   |                    |
|                     | TVSRC              |                             |                    |                  |                     |                   |                    |
|                     | GDPB               |                             |                    |                  |                     |                   |                    |
|                     | GDPB <sup>2</sup>  |                             |                    |                  |                     |                   |                    |
|                     | GDPI               |                             |                    |                  |                     |                   |                    |
|                     | GDP                |                             |                    |                  |                     |                   |                    |
| Energy              | CARS               | Energy                      |                    |                  |                     |                   |                    |
|                     | ELC                |                             |                    |                  |                     |                   |                    |
|                     | TEC                |                             |                    |                  |                     |                   |                    |
| Population          | Pop                | Population                  |                    |                  |                     |                   |                    |
|                     | Pop-Den            |                             |                    |                  |                     |                   |                    |

(Model 1 included only green cover and NO<sub>2</sub> concentrations (green-only model). Model 2 included predictors of Model 1 and environmental factors (environmental model). Model 3 included predictors of Model 2 and economic factors (economic model). Model 4 included predictors of Model 3 and energy consumption factors (energy model). Model 5 is the full model, including predictors of model 4 and population factors. Predictors are: green cover (Green), NO<sub>2</sub> concentrations (NO<sub>2</sub>), Particle matter concentration (PM), Fine particle matter concentration (PM<sub>2.5</sub>), SO<sub>2</sub> concentration, environmental protection expenditure (Exp-Envir, log transformed), per

capita disposable income (PCDI), total retail sales of consumer goods (TVSRC), GDP, GDP of industry (GDPI), GDP of construction (GDPB, GDPB<sup>2</sup>), car ownership (CARS), total electricity consumption (ELC), total energy consumption (TEC), population (Pop), population density (Pop-Den, log transformed). The factors included in the models are presented with different colors. Pink grids represent environmental factors, light green grids represent economic factors, light blue grids represent energy factors, red grids represent population factors, dark slash grids represent factors excluded from each model.)

Table S5. Model averaging of the final best models within a  $\Delta AICc < 5$  (See model 6 in Table S3) for NO<sub>2</sub> removal capacity.

| Models           |                   | Subset 1 | Subset 2 | Subset 3 | Subset 4 |
|------------------|-------------------|----------|----------|----------|----------|
| Model parameters | Weight            | 0.60     | 0.22     | 0.12     | 0.06     |
|                  | AICc              | 144.08   | 146.06   | 147.27   | 148.60   |
|                  | $\Delta AICc$     | 0.00     | 1.98     | 3.19     | 4.52     |
| Environment      | Green             |          |          |          |          |
|                  | NO <sub>2</sub>   |          |          |          |          |
|                  | PM                |          |          |          |          |
|                  | PM <sub>2.5</sub> |          |          |          |          |
|                  | SO <sub>2</sub>   |          |          |          |          |
| Economic         | Exp-Envir         |          |          |          |          |
|                  | PCDI              |          |          |          |          |
|                  | TVSRC             |          |          |          |          |
|                  | GDPB              |          |          |          |          |
|                  | GDPB <sup>2</sup> |          |          |          |          |
|                  | GDPI              |          |          |          |          |
|                  | GDP               |          |          |          |          |
| Energy           | CARS              |          |          |          |          |
|                  | ELC               |          |          |          |          |
|                  | TEC               |          |          |          |          |
| Population       | Pop               |          |          |          |          |
|                  | Pop-Den           |          |          |          |          |

(The factors included in the models are presented with different colors. Check abbreviations and colors in Table S3.)

Table S6 The scores of explanatory factors on the principal components

|                   |                        | PC1    | PC2    | PC3    |
|-------------------|------------------------|--------|--------|--------|
| Components        | Eigenvalue             | 7.053  | 2.293  | 2.080  |
|                   | Proportion Explained   | 0.504  | 0.164  | 0.149  |
|                   | Cumulative             | 0.504  | 0.668  | 0.816  |
| Scores of factors | Absorb NO <sub>2</sub> | -0.933 | 0.787  | -0.622 |
|                   | GDP                    | 1.511  | -0.228 | -0.083 |
|                   | Population             | 1.459  | 0.375  | 0.025  |

|                 |       |        |        |
|-----------------|-------|--------|--------|
| TVSRC           | 1.543 | -0.077 | -0.019 |
| GDP-I           | 0.909 | 0.798  | -0.335 |
| GDP-B           | 1.366 | -0.126 | 0.086  |
| Pop-Den         | 0.808 | -0.968 | 0.603  |
| Exp-env         | 0.670 | 0.836  | -0.582 |
| PCDI            | 1.024 | -1.104 | -0.257 |
| TEC             | 1.047 | 0.812  | -0.328 |
| ELC             | 1.517 | 0.351  | -0.166 |
| CARS            | 1.563 | -0.045 | 0.116  |
| SO <sub>2</sub> | 0.048 | 0.693  | 1.413  |
| PM              | 0.167 | 0.621  | 1.411  |

## References

- Beijing Municipal Bureau Statistics, 2020. Beijing Statistical Yearbook. China Statistics Press: Beijing, China, 2020.
- Cabaraban, M.T.I., Kroll, C.N., Hirabayashi, S., Nowak, D.J., 2013. Modeling of air pollutant removal by dry deposition to urban trees using a WRF/CMAQ/i-Tree Eco coupled system. *Environ Pollut* 176, 123-133.
- Escobedo, F.J., Nowak, D.J., 2009. Spatial heterogeneity and air pollution removal by an urban forest. *Landscape And Urban Planning* 90, 102-110.
- Hirabayashi, S., Nowak, D.J., 2016. Comprehensive national database of tree effects on air quality and human health in the United States. *Environ Pollut* 215, 48-57.
- Nowak, D.J., Crane, D.E., Stevens, J.C., 2006. Air pollution removal by urban trees and shrubs in the United States. *Urban Forestry & Urban Greening* 4, 115-123.
- Parsa, V.A., Salehi, E., Yavari, A.R., van Bodegom, P.M., 2019. Analyzing temporal changes in urban forest structure and the effect on air quality improvement. *Sustainable Cities And Society* 48.
- Wu, J., Wang, Y., Qiu, S., Peng, J., 2019. Using the modified i-Tree Eco model to quantify air pollution removal by urban vegetation. *Sci Total Environ* 688, 673-683.
- Yang, J., McBride, J., Zhou, J., Sun, Z., 2005. The urban forest in Beijing and its role in air pollution reduction. *Urban Forestry & Urban Greening* 3, 65-78.
